# Supplementary material for: Changing epidemiology of SARS-CoV-2 positivity rates in a diverse population of children and adults during variant evolution and progressive vaccination eligibility in New York City
Source: Research Square preprint supplement (doi:10.21203/rs.3.rs-7104064/v1), 2025-08-27
Supplement: Supplementary file 1 [file e23a6ac2b742765b3a79e1ce.xlsx]

## Sheet: WMC variant samples 5.17.24
GISAID Accession	PCT_Resolved
EPI_ISL_2455393	99.559
N/A	83.353
N/A	89.857
EPI_ISL_2450647	99.666
EPI_ISL_2450684	98.85
EPI_ISL_2450679	99.261
EPI_ISL_2450687	98.137
EPI_ISL_3246683	98.047
EPI_ISL_3246638	99.666
EPI_ISL_3246679	99.555
EPI_ISL_3246624	99.666
EPI_ISL_3246623	99.666
EPI_ISL_3246676	99.555
EPI_ISL_3246625	99.666
EPI_ISL_3246650	99.562
N/A	17.814
N/A	22.894
N/A	68.177
EPI_ISL_3246645	99.666
N/A	47.186
N/A	59.342
EPI_ISL_3246652	99.559
EPI_ISL_3246626	99.666
EPI_ISL_3246653	99.559
EPI_ISL_1968594	99.559
N/A	54.717
EPI_ISL_1968583	99.666
EPI_ISL_1968590	99.562
EPI_ISL_1968619	99.555
EPI_ISL_1968569	99.666
EPI_ISL_1968570	99.666
EPI_ISL_1968614	99.555
EPI_ISL_1968574	99.666
EPI_ISL_2031769	99.662
EPI_ISL_1968588	99.662
EPI_ISL_2450690	96.706
EPI_ISL_1968596	99.559
EPI_ISL_2283197	99.559
EPI_ISL_2031768	99.666
EPI_ISL_1968561	99.666
EPI_ISL_1968593	99.562
EPI_ISL_1968621	99.472
N/A	0
EPI_ISL_2283208	99.559
N/A	92.158
EPI_ISL_1968577	99.666
EPI_ISL_1968620	99.555
EPI_ISL_2450619	99.666
N/A	62.522
N/A	94.693
EPI_ISL_2283146	99.559
N/A	45.778
N/A	32.258
EPI_ISL_2450651	99.559
EPI_ISL_2450621	99.666
EPI_ISL_2450656	99.559
EPI_ISL_2450658	99.559
EPI_ISL_5365808	95.616
EPI_ISL_8083532	99.559
EPI_ISL_2450664	99.559
EPI_ISL_2450689	96.77
EPI_ISL_2450628	99.666
N/A	55.463
N/A	8.407
EPI_ISL_2450676	99.385
EPI_ISL_2450644	99.666
N/A	94.669
EPI_ISL_2450662	99.559
N/A	2.491
EPI_ISL_5365763	99.555
EPI_ISL_2283204	99.559
EPI_ISL_2283124	99.666
N/A	91.703
N/A	2.341
EPI_ISL_2450646	99.666
EPI_ISL_5365468	99.666
EPI_ISL_2450643	99.666
EPI_ISL_2450634	99.666
EPI_ISL_2450627	99.666
N/A	7.809
EPI_ISL_1968579	99.666
EPI_ISL_2450626	99.666
N/A	31.338
EPI_ISL_2450663	99.559
N/A	40.32
EPI_ISL_3246681	99.107
EPI_ISL_1968600	99.559
EPI_ISL_2450659	99.559
EPI_ISL_8083530	99.559
EPI_ISL_5365620	99.559
EPI_ISL_2450654	99.559
EPI_ISL_2450666	99.559
EPI_ISL_1968612	99.555
EPI_ISL_2450683	98.91
N/A	85.654
EPI_ISL_1968625	98.686
EPI_ISL_1968601	99.559
EPI_ISL_1968609	99.555
EPI_ISL_1968613	99.555
N/A	63.856
EPI_ISL_1968608	99.559
N/A	92.278
N/A	6.13
EPI_ISL_1968582	99.666
EPI_ISL_2443784	99.559
EPI_ISL_2443785	99.559
EPI_ISL_2031770	99.562
EPI_ISL_1968617	99.555
EPI_ISL_1968592	99.562
EPI_ISL_1968580	99.666
EPI_ISL_2283119	99.666
EPI_ISL_1968598	99.559
EPI_ISL_2450669	99.559
EPI_ISL_1968618	99.555
EPI_ISL_2450649	99.562
EPI_ISL_1968566	99.666
EPI_ISL_2450617	99.666
N/A	2.2
N/A	0.358
EPI_ISL_2450653	99.559
EPI_ISL_2402824	99.559
EPI_ISL_2402882	99.555
EPI_ISL_2402827	99.559
EPI_ISL_2283154	99.559
N/A	0
EPI_ISL_2402889	99.555
EPI_ISL_2402935	95.449
EPI_ISL_2402896	99.555
EPI_ISL_2450625	99.666
EPI_ISL_2402850	99.559
EPI_ISL_2450630	99.666
EPI_ISL_2402910	99.549
EPI_ISL_2450672	99.555
EPI_ISL_2450680	99.197
N/A	7.949
EPI_ISL_1968626	97.99
EPI_ISL_1968572	99.666
EPI_ISL_1968591	99.562
N/A	87.152
N/A	11.985
N/A	0.592
N/A	3.164
EPI_ISL_2443795	98.498
EPI_ISL_2450618	99.666
EPI_ISL_2450622	99.666
EPI_ISL_2402820	99.559
EPI_ISL_2402928	98.01
EPI_ISL_2450652	99.559
N/A	3.043
EPI_ISL_2450670	99.555
EPI_ISL_2450639	99.666
EPI_ISL_2455395	99.475
EPI_ISL_2450620	99.666
EPI_ISL_2450650	99.559
N/A	0
N/A	76.685
N/A	0
N/A	2.455
N/A	13.47
EPI_ISL_2402885	99.555
EPI_ISL_2402886	99.555
EPI_ISL_2402843	99.559
N/A	25.038
EPI_ISL_2450629	99.666
EPI_ISL_2402925	98.274
N/A	0
EPI_ISL_2450686	98.298
EPI_ISL_2402860	99.559
EPI_ISL_2450641	99.666
EPI_ISL_2402857	99.559
EPI_ISL_2402816	99.559
N/A	4.23
EPI_ISL_2402929	97.883
EPI_ISL_2402871	99.559
EPI_ISL_2402870	99.559
EPI_ISL_2402815	99.562
EPI_ISL_2402922	99.013
EPI_ISL_2402930	97.662
N/A	10.584
EPI_ISL_2402890	99.555
EPI_ISL_2402869	99.559
N/A	4.501
N/A	83.406
EPI_ISL_2450673	99.555
EPI_ISL_2450624	99.666
EPI_ISL_2450633	99.666
N/A	92.181
EPI_ISL_2450648	99.666
EPI_ISL_2450675	99.411
EPI_ISL_2450668	99.559
EPI_ISL_2450636	99.666
EPI_ISL_2450635	99.666
EPI_ISL_2402817	99.559
EPI_ISL_2402826	99.559
EPI_ISL_2450655	99.559
N/A	91.389
N/A	80.611
EPI_ISL_2402920	99.064
EPI_ISL_2402906	99.555
EPI_ISL_2402865	99.559
EPI_ISL_2402921	99.017
N/A	76.223
EPI_ISL_2402868	99.559
EPI_ISL_2402895	99.555
EPI_ISL_2402872	99.559
N/A	11.925
N/A	94.138
N/A	26.867
EPI_ISL_2455394	99.559
EPI_ISL_2450677	99.331
EPI_ISL_2450631	99.666
EPI_ISL_2450632	99.666
EPI_ISL_2450665	99.559
EPI_ISL_2402841	99.559
EPI_ISL_8083528	99.559
EPI_ISL_2402852	99.559
EPI_ISL_2402861	99.559
EPI_ISL_2402883	99.555
N/A	94.937
EPI_ISL_2402914	99.314
N/A	0.625
EPI_ISL_8083573	99.562
EPI_ISL_2402844	99.559
N/A	92.737
EPI_ISL_8083527	99.666
EPI_ISL_8083574	98.545
N/A	69.572
EPI_ISL_8083536	99.127
EPI_ISL_8083577	95.566
EPI_ISL_8083529	99.559
EPI_ISL_7808654	99.666
EPI_ISL_8083559	99.559
EPI_ISL_2402881	99.555
N/A	0
N/A	41.14
EPI_ISL_2402879	99.555
EPI_ISL_2402887	99.555
EPI_ISL_2402837	99.559
EPI_ISL_2402917	99.281
EPI_ISL_2402934	95.706
EPI_ISL_2402876	99.555
EPI_ISL_2402932	96.318
N/A	74.461
EPI_ISL_2450645	99.666
N/A	41.3
EPI_ISL_2402832	99.559
EPI_ISL_2402839	99.559
EPI_ISL_2402884	99.555
EPI_ISL_2402854	99.559
N/A	41.645
EPI_ISL_2402907	99.555
N/A	46.674
N/A	80.356
N/A	0
EPI_ISL_2402893	99.555
EPI_ISL_2402878	99.555
N/A	90.061
EPI_ISL_2402823	99.559
EPI_ISL_2402828	99.559
EPI_ISL_2402833	99.559
N/A	0
EPI_ISL_2402888	99.555
N/A	17.851
EPI_ISL_2402813	99.666
EPI_ISL_2402905	99.555
EPI_ISL_2402892	99.555
EPI_ISL_2402926	98.244
N/A	85.032
EPI_ISL_2402903	99.555
EPI_ISL_2402897	99.555
EPI_ISL_2402898	99.555
N/A	0
EPI_ISL_2402842	99.559
EPI_ISL_2402924	98.669
EPI_ISL_2402846	99.559
EPI_ISL_7808655	99.666
N/A	73.712
N/A	16.243
N/A	81.487
EPI_ISL_2402880	99.555
N/A	94.756
N/A	54.282
EPI_ISL_2402873	99.559
EPI_ISL_8083526	99.666
EPI_ISL_8083562	99.666
EPI_ISL_2273909	99.559
EPI_ISL_2273877	99.666
EPI_ISL_2402834	99.559
EPI_ISL_2402919	99.187
EPI_ISL_2402848	99.559
EPI_ISL_2402915	99.288
N/A	0
N/A	0
N/A	0
N/A	0
N/A	93.201
EPI_ISL_2402923	98.846
EPI_ISL_2402918	99.268
N/A	31.519
EPI_ISL_2402864	99.559
EPI_ISL_2402821	99.559
N/A	20.403
EPI_ISL_2402912	99.438
EPI_ISL_2402877	99.555
EPI_ISL_2402900	99.555
N/A	40.949
N/A	0
EPI_ISL_2402913	99.378
N/A	5.588
N/A	12.293
EPI_ISL_3246664	99.559
N/A	11.517
N/A	23.663
EPI_ISL_7808656	99.666
N/A	93.904
N/A	30.93
EPI_ISL_2273911	99.559
N/A	0
N/A	6.167
N/A	0.13
N/A	0
N/A	0.719
EPI_ISL_8083534	99.485
N/A	0
EPI_ISL_2402830	99.559
EPI_ISL_2402831	99.559
EPI_ISL_2402840	99.559
EPI_ISL_2402853	99.559
EPI_ISL_2402814	99.562
EPI_ISL_2402835	99.559
EPI_ISL_2402858	99.559
EPI_ISL_2402829	99.559
EPI_ISL_2402847	99.559
EPI_ISL_2273886	99.562
N/A	0
N/A	75.447
EPI_ISL_2283194	99.559
N/A	0
EPI_ISL_2443790	99.462
EPI_ISL_2273927	99.559
N/A	93.452
N/A	70.394
EPI_ISL_2273918	99.559
N/A	50.731
EPI_ISL_2273957	99.555
N/A	76.27
N/A	1.903
EPI_ISL_2273938	99.559
EPI_ISL_2273939	99.559
EPI_ISL_2273975	99.147
N/A	11.35
EPI_ISL_2273983	98.729
EPI_ISL_2283159	99.559
N/A	91.322
N/A	0.02
EPI_ISL_2273955	99.555
EPI_ISL_2273972	99.204
EPI_ISL_2273887	99.562
EPI_ISL_2273879	99.666
EPI_ISL_2273921	99.559
EPI_ISL_2273940	99.559
EPI_ISL_2273971	99.217
EPI_ISL_2273871	99.666
EPI_ISL_2273978	99.087
EPI_ISL_2273951	99.555
EPI_ISL_2273902	99.559
EPI_ISL_2273904	99.559
EPI_ISL_2273917	99.559
N/A	6.708
EPI_ISL_2273958	99.555
EPI_ISL_2443791	98.993
EPI_ISL_2273928	99.559
N/A	87.051
EPI_ISL_2273873	99.666
EPI_ISL_2273941	99.559
EPI_ISL_2273965	99.555
EPI_ISL_2273884	99.562
EPI_ISL_2273905	99.559
EPI_ISL_2273946	99.555
N/A	4.785
EPI_ISL_2283245	99.549
N/A	0
N/A	15.734
N/A	44.534
EPI_ISL_2273953	99.555
EPI_ISL_2273915	99.559
N/A	69.953
EPI_ISL_2273881	99.666
EPI_ISL_2283272	98.174
EPI_ISL_2273900	99.559
EPI_ISL_2283253	99.294
N/A	73.959
EPI_ISL_2273889	99.562
EPI_ISL_2273973	99.197
EPI_ISL_2273989	98.004
N/A	63.703
EPI_ISL_2283259	99.268
N/A	41.705
EPI_ISL_2273944	99.559
N/A	0
EPI_ISL_2283151	99.559
N/A	1.167
EPI_ISL_2283184	99.559
N/A	49.313
EPI_ISL_2283129	99.559
EPI_ISL_2402927	98.161
EPI_ISL_2273898	99.559
EPI_ISL_2283265	98.86
N/A	2.09
EPI_ISL_2283221	99.555
EPI_ISL_2283158	99.559
EPI_ISL_2283269	98.485
EPI_ISL_2283223	99.555
EPI_ISL_2402849	99.559
N/A	82.975
EPI_ISL_2273969	99.468
EPI_ISL_2273910	99.559
N/A	94.499
EPI_ISL_2273987	98.412
EPI_ISL_2283233	99.555
EPI_ISL_2273991	97.763
N/A	66.809
N/A	10.862
N/A	17.868
N/A	91.078
N/A	93.981
EPI_ISL_2273954	99.555
EPI_ISL_2273947	99.555
N/A	0
EPI_ISL_2273966	99.555
EPI_ISL_2273956	99.555
EPI_ISL_2273997	96.184
EPI_ISL_2273875	99.666
EPI_ISL_2273913	99.559
EPI_ISL_2402867	99.559
N/A	1.137
N/A	1.033
N/A	21.971
N/A	0.719
EPI_ISL_2283217	99.555
EPI_ISL_2283281	95.903
N/A	1.568
EPI_ISL_2283234	99.555
EPI_ISL_2283190	99.559
EPI_ISL_2283260	99.137
EPI_ISL_2283132	99.559
N/A	56.509
N/A	67.492
EPI_ISL_2273892	99.559
EPI_ISL_2283263	98.94
N/A	0
EPI_ISL_2283116	99.666
EPI_ISL_2283226	99.555
EPI_ISL_2283231	99.555
EPI_ISL_2283177	99.559
EPI_ISL_2283189	99.559
N/A	84.831
EPI_ISL_2283244	99.549
EPI_ISL_2273929	99.559
N/A	0.391
EPI_ISL_2283114	99.666
N/A	92.215
N/A	77.571
EPI_ISL_2283228	99.555
EPI_ISL_2283213	99.555
EPI_ISL_7041081	99.559
N/A	0.612
EPI_ISL_2283205	99.559
EPI_ISL_8083524	99.666
EPI_ISL_2283275	97.83
N/A	36.608
EPI_ISL_2283195	99.559
N/A	68.354
N/A	0
N/A	0
EPI_ISL_2273920	99.559
EPI_ISL_2273961	99.555
EPI_ISL_2273945	99.559
EPI_ISL_8083578	95.753
EPI_ISL_8083525	99.666
EPI_ISL_2283142	99.559
N/A	18.132
EPI_ISL_2283138	99.559
EPI_ISL_3246644	99.666
EPI_ISL_2273894	99.559
N/A	17.784
EPI_ISL_2283162	99.559
N/A	80.554
EPI_ISL_2273882	99.662
N/A	77.333
N/A	84.961
N/A	80.791
N/A	31.251
N/A	6.575
EPI_ISL_2273993	97.458
EPI_ISL_2273895	99.559
EPI_ISL_2273908	99.559
EPI_ISL_2273970	99.271
EPI_ISL_2273960	99.555
EPI_ISL_2273937	99.559
EPI_ISL_2443787	99.559
N/A	86.633
EPI_ISL_2273935	99.559
EPI_ISL_3246674	99.559
EPI_ISL_3246639	99.666
N/A	16.239
N/A	74.986
N/A	32.682
N/A	32.07
EPI_ISL_1968604	99.559
EPI_ISL_1968616	99.555
N/A	0
N/A	25.058
N/A	15.179
EPI_ISL_1968589	99.662
EPI_ISL_1968562	99.666
EPI_ISL_2283122	99.666
N/A	75.083
EPI_ISL_2450642	99.666
EPI_ISL_2273880	99.666
N/A	73.698
EPI_ISL_2273936	99.559
EPI_ISL_2273916	99.559
EPI_ISL_2283180	99.559
EPI_ISL_2273992	97.649
EPI_ISL_1968615	99.555
EPI_ISL_1968622	99.298
EPI_ISL_1968578	99.666
EPI_ISL_1968599	99.559
N/A	74.424
EPI_ISL_2283220	99.555
N/A	91.6
N/A	40.066
N/A	23.386
N/A	13.002
EPI_ISL_2283139	99.559
EPI_ISL_2283210	99.555
EPI_ISL_2283130	99.559
EPI_ISL_2273896	99.559
EPI_ISL_2283247	99.475
EPI_ISL_5365775	99.555
EPI_ISL_2443783	99.559
EPI_ISL_2283156	99.559
EPI_ISL_2273919	99.559
EPI_ISL_2443788	99.559
EPI_ISL_2283170	99.559
EPI_ISL_2283254	99.288
EPI_ISL_2273932	99.559
EPI_ISL_1968568	99.666
N/A	60.529
EPI_ISL_2273876	99.666
EPI_ISL_2273942	99.559
EPI_ISL_2283178	99.559
EPI_ISL_2283172	99.559
EPI_ISL_2283127	99.559
EPI_ISL_2283134	99.559
EPI_ISL_2273874	99.666
EPI_ISL_2283153	99.559
N/A	0
EPI_ISL_2283236	99.555
EPI_ISL_2283121	99.666
EPI_ISL_2283187	99.559
N/A	0
N/A	88.011
EPI_ISL_2283257	99.271
N/A	91.844
N/A	6.792
EPI_ISL_2283239	99.555
EPI_ISL_2283148	99.559
EPI_ISL_5365776	99.555
EPI_ISL_5365793	98.254
EPI_ISL_5365807	96.562
EPI_ISL_5365748	99.559
N/A	5.334
N/A	92.797
N/A	33.187
EPI_ISL_5365781	99.492
EPI_ISL_5365788	98.903
EPI_ISL_2283150	99.559
EPI_ISL_5365789	98.789
EPI_ISL_3246646	99.666
EPI_ISL_2283215	99.555
N/A	4.408
N/A	88.275
N/A	15.804
EPI_ISL_5365749	99.559
EPI_ISL_5365745	99.559
EPI_ISL_5365740	99.559
N/A	6.732
N/A	0
EPI_ISL_2273924	99.559
EPI_ISL_2283202	99.559
EPI_ISL_2273995	97.084
N/A	52.443
N/A	0
N/A	0
EPI_ISL_5365778	99.555
EPI_ISL_2283117	99.666
EPI_ISL_2283192	99.559
EPI_ISL_2283167	99.559
EPI_ISL_2283186	99.559
EPI_ISL_2283229	99.555
EPI_ISL_1968586	99.666
EPI_ISL_1968565	99.666
EPI_ISL_1968602	99.559
EPI_ISL_1968571	99.666
N/A	84.975
EPI_ISL_2283199	99.559
N/A	26.312
EPI_ISL_2283161	99.559
N/A	0
N/A	0
EPI_ISL_2283212	99.555
EPI_ISL_2283136	99.559
EPI_ISL_2283164	99.559
N/A	12.052
N/A	0.314
EPI_ISL_2283279	96.469
EPI_ISL_2402838	99.559
EPI_ISL_5365733	99.559
N/A	7.809
EPI_ISL_3246632	99.666
EPI_ISL_5365732	99.559
EPI_ISL_5365766	99.555
EPI_ISL_2283237	99.555
EPI_ISL_5365795	98.238
EPI_ISL_5365734	99.559
N/A	89.406
EPI_ISL_2283175	99.559
N/A	84.701
EPI_ISL_5365784	99.442
EPI_ISL_2283126	99.662
EPI_ISL_5365768	99.555
EPI_ISL_2283225	99.555
EPI_ISL_2283248	99.442
N/A	1.706
EPI_ISL_2283182	99.559
N/A	0
N/A	21.483
EPI_ISL_2283273	98.047
N/A	86.801
EPI_ISL_2283207	99.559
N/A	28.539
N/A	25.713
EPI_ISL_2283283	95.171
N/A	69.913
EPI_ISL_2283200	99.559
EPI_ISL_2283276	96.709
N/A	56.432
EPI_ISL_5365799	97.816
EPI_ISL_5365739	99.559
N/A	0
N/A	91.907
EPI_ISL_5365727	99.559
N/A	20.948
N/A	23.473
EPI_ISL_5365737	99.559
N/A	27.465
EPI_ISL_1968611	99.555
EPI_ISL_1968581	99.666
EPI_ISL_1968564	99.666
EPI_ISL_5365736	99.559
EPI_ISL_1968575	99.666
EPI_ISL_1968585	99.666
EPI_ISL_1968597	99.559
EPI_ISL_2450640	99.666
N/A	54.433
N/A	53.737
EPI_ISL_1968606	99.559
EPI_ISL_1968607	99.559
EPI_ISL_1968610	99.555
N/A	41.594
EPI_ISL_1968624	98.916
EPI_ISL_1968563	99.666
EPI_ISL_5365738	99.559
EPI_ISL_5365767	99.555
N/A	66.144
EPI_ISL_5365735	99.559
N/A	93.8
EPI_ISL_1968603	99.559
EPI_ISL_1968584	99.666
N/A	70.14
EPI_ISL_2273925	99.559
EPI_ISL_1968605	99.559
EPI_ISL_1968587	99.662
EPI_ISL_2450667	99.559
EPI_ISL_1968573	99.666
N/A	39.073
N/A	13.838
EPI_ISL_1968576	99.666
EPI_ISL_1968627	96.8
EPI_ISL_1968567	99.666
EPI_ISL_2031771	99.562
N/A	0
EPI_ISL_1968595	99.559
N/A	45.424
EPI_ISL_3246662	99.559
N/A	18.115
N/A	24.519
N/A	7.123
EPI_ISL_5365618	99.666
EPI_ISL_1379203	99.559
EPI_ISL_1379217	95.258
N/A	22.152
EPI_ISL_1379210	99.01
EPI_ISL_2283145	99.559
N/A	72.862
EPI_ISL_1379202	99.562
EPI_ISL_1379208	99.555
N/A	8.12
EPI_ISL_1379207	99.555
EPI_ISL_1379214	97.937
EPI_ISL_1379212	98.054
N/A	0
N/A	46.945
EPI_ISL_1379201	99.562
EPI_ISL_1379205	99.555
EPI_ISL_1379198	99.666
EPI_ISL_1379215	97.893
N/A	1.428
EPI_ISL_1379206	99.555
N/A	29.228
EPI_ISL_5365797	97.937
N/A	11.173
EPI_ISL_2273885	99.562
EPI_ISL_2273872	99.666
N/A	0.796
N/A	25.342
EPI_ISL_2273976	99.141
EPI_ISL_2273912	99.559
EPI_ISL_1379199	99.666
N/A	13.29
EPI_ISL_2273988	98.365
EPI_ISL_2273933	99.559
N/A	94.051
N/A	78.046
N/A	31.94
EPI_ISL_1379200	99.666
N/A	6.468
EPI_ISL_1968725	95.041
EPI_ISL_2273964	99.555
EPI_ISL_2402891	99.555
N/A	7.738
EPI_ISL_1379209	99.034
EPI_ISL_1379204	99.559
N/A	1.518
N/A	0.719
EPI_ISL_2273998	95.653
EPI_ISL_2402909	99.549
N/A	4.869
EPI_ISL_2273914	99.559
EPI_ISL_1379211	98.141
EPI_ISL_2402899	99.555
EPI_ISL_2402904	99.555
N/A	90.426
N/A	59.242
EPI_ISL_2402863	99.559
N/A	29.676
N/A	77.751
N/A	18.61
N/A	49.717
N/A	73.287
N/A	85.59
EPI_ISL_2273878	99.666
EPI_ISL_2273962	99.555
N/A	90.108
EPI_ISL_2443792	98.101
EPI_ISL_2273968	99.555
EPI_ISL_2273980	99.013
N/A	58.777
EPI_ISL_2450637	99.666
N/A	65.926
EPI_ISL_19214059	99.666
EPI_ISL_2273891	99.559
EPI_ISL_2273948	99.555
EPI_ISL_2273922	99.559
EPI_ISL_1379248	99.555
EPI_ISL_1968718	99.294
EPI_ISL_2273931	99.559
EPI_ISL_17951203	99.492
N/A	0.01
EPI_ISL_2273897	99.559
EPI_ISL_2273985	98.592
EPI_ISL_2273901	99.559
EPI_ISL_2273952	99.555
N/A	72.324
EPI_ISL_2273893	99.559
N/A	45.584
EPI_ISL_1379213	97.967
EPI_ISL_2283174	99.559
N/A	0.676
EPI_ISL_1379241	99.559
EPI_ISL_1379222	99.666
EPI_ISL_1379234	99.559
EPI_ISL_1379216	97.763
EPI_ISL_1379226	99.666
EPI_ISL_1379230	99.562
EPI_ISL_2283242	99.555
EPI_ISL_1379229	99.662
EPI_ISL_1379239	99.559
N/A	88.055
EPI_ISL_1379231	99.562
N/A	6.829
EPI_ISL_3246661	99.559
EPI_ISL_5365774	99.555
EPI_ISL_3246660	99.559
N/A	16.681
EPI_ISL_1379219	99.666
EPI_ISL_1379236	99.559
EPI_ISL_1968717	99.666
N/A	0.946
N/A	0.538
EPI_ISL_2283250	99.408
EPI_ISL_1379228	99.666
EPI_ISL_1379238	99.559
N/A	59.074
N/A	85.54
EPI_ISL_5365785	99.442
EPI_ISL_5365782	99.468
N/A	76.42
EPI_ISL_8083561	99.385
N/A	44.745
EPI_ISL_7808657	99.666
EPI_ISL_1379243	99.555
EPI_ISL_1379218	99.666
N/A	75.364
EPI_ISL_1379235	99.559
EPI_ISL_17951198	99.652
EPI_ISL_1379227	99.666
EPI_ISL_1379250	99.555
N/A	33.773
EPI_ISL_2193766	97.813
EPI_ISL_1379240	99.559
EPI_ISL_1379252	99.388
EPI_ISL_1379246	99.555
EPI_ISL_17951199	99.609
N/A	59.298
N/A	27.813
EPI_ISL_3246663	99.559
EPI_ISL_1379257	95.415
EPI_ISL_1379221	99.666
EPI_ISL_1379245	99.555
EPI_ISL_2193763	99.395
EPI_ISL_1379255	97.482
EPI_ISL_1379225	99.666
EPI_ISL_1379244	99.555
N/A	92.837
EPI_ISL_1379251	99.555
EPI_ISL_1379253	99.12
N/A	21.7
EPI_ISL_1379223	99.666
EPI_ISL_17951196	99.89
N/A	89.429
N/A	0.739
N/A	32.044
EPI_ISL_2283256	99.274
EPI_ISL_2283270	98.198
N/A	44.534
EPI_ISL_1379233	99.559
N/A	43.186
EPI_ISL_2193762	99.498
N/A	86.597
EPI_ISL_2193765	98.953
EPI_ISL_2193764	99.057
EPI_ISL_17951197	99.806
EPI_ISL_2283166	99.559
EPI_ISL_2283267	98.749
EPI_ISL_2283251	99.304
EPI_ISL_1379249	99.555
N/A	40.852
N/A	60.422
N/A	94.944
EPI_ISL_1379256	95.994
EPI_ISL_1379237	99.559
EPI_ISL_1379254	99.07
EPI_ISL_2283169	99.559
EPI_ISL_2283278	96.582
EPI_ISL_1379242	99.559
N/A	82.477
EPI_ISL_1379378	99.555
EPI_ISL_1379349	99.562
EPI_ISL_1968724	99.037
EPI_ISL_1379340	99.666
EPI_ISL_1379339	99.666
EPI_ISL_2273906	99.559
EPI_ISL_2273963	99.555
EPI_ISL_2402836	99.559
EPI_ISL_1379377	99.555
EPI_ISL_1971190	99.559
N/A	9.14
N/A	4.598
EPI_ISL_1379355	99.559
EPI_ISL_1379356	99.559
EPI_ISL_2273977	99.09
EPI_ISL_2273943	99.559
N/A	66.017
N/A	61.726
N/A	29.472
N/A	3.755
EPI_ISL_1379266	97.194
EPI_ISL_1971155	99.666
EPI_ISL_1971158	99.666
N/A	0
N/A	1.826
EPI_ISL_1968719	99.666
N/A	83.587
EPI_ISL_1379258	99.666
N/A	83.273
EPI_ISL_1971185	99.559
N/A	32.358
N/A	63.616
EPI_ISL_1379261	99.559
EPI_ISL_1379264	99.472
EPI_ISL_1971219	99.187
N/A	2.304
EPI_ISL_1379262	99.559
EPI_ISL_1379265	98.01
EPI_ISL_1379259	99.562
N/A	84.67
EPI_ISL_1379260	99.559
EPI_ISL_1379263	99.555
N/A	20.058
N/A	94.335
EPI_ISL_1971214	99.555
EPI_ISL_1971196	99.559
EPI_ISL_1971156	99.666
N/A	15.233
EPI_ISL_1971223	98.799
N/A	87.469
EPI_ISL_1379341	99.666
EPI_ISL_1971208	99.555
EPI_ISL_1971213	99.555
EPI_ISL_1971207	99.555
EPI_ISL_1971211	99.555
EPI_ISL_1971210	99.555
N/A	68.391
EPI_ISL_1379388	99.06
EPI_ISL_1379358	99.559
N/A	30.448
EPI_ISL_1379359	99.559
EPI_ISL_1379360	99.559
N/A	34.866
EPI_ISL_1379380	99.555
N/A	70.357
EPI_ISL_1379379	99.555
EPI_ISL_1379357	99.559
N/A	22.67
EPI_ISL_1971186	99.559
EPI_ISL_1968722	99.662
N/A	22.673
N/A	86.062
EPI_ISL_1379343	99.666
EPI_ISL_1971162	99.666
EPI_ISL_1968723	99.559
N/A	56.429
EPI_ISL_1379389	98.793
EPI_ISL_1379342	99.666
EPI_ISL_1379350	99.562
N/A	9.835
EPI_ISL_1379381	99.555
N/A	3.354
N/A	25.877
EPI_ISL_1379385	99.442
EPI_ISL_1379386	99.442
N/A	9.895
N/A	65.863
EPI_ISL_1379344	99.666
EPI_ISL_1379345	99.666
EPI_ISL_1971221	99.034
EPI_ISL_1971228	97.649
EPI_ISL_1971178	99.562
N/A	58.66
EPI_ISL_1379361	99.559
EPI_ISL_1971203	99.555
EPI_ISL_1379352	99.562
EPI_ISL_1379382	99.555
EPI_ISL_1379351	99.562
EPI_ISL_1379390	97.589
EPI_ISL_1379362	99.559
EPI_ISL_1379383	99.555
N/A	92.489
N/A	32.278
EPI_ISL_1971227	98.351
N/A	90.436
N/A	50.861
EPI_ISL_1379363	99.559
N/A	0
EPI_ISL_1379384	99.555
N/A	20.526
EPI_ISL_1379364	99.559
EPI_ISL_1379365	99.559
EPI_ISL_1379366	99.559
EPI_ISL_1379371	99.559
EPI_ISL_1971198	99.555
EPI_ISL_5365742	99.559
EPI_ISL_3246659	99.559
N/A	6.233
EPI_ISL_1379367	99.559
N/A	94.549
EPI_ISL_1379370	99.559
EPI_ISL_1379369	99.559
N/A	36.742
EPI_ISL_1971202	99.555
EPI_ISL_1379368	99.559
EPI_ISL_5365805	96.599
EPI_ISL_5365619	99.562
N/A	60.613
EPI_ISL_1379353	99.562
EPI_ISL_1379387	99.294
N/A	21.891
N/A	60.175
EPI_ISL_5365741	99.559
N/A	58.72
EPI_ISL_1971181	99.562
EPI_ISL_1379354	99.562
N/A	0.033
EPI_ISL_1379346	99.666
EPI_ISL_1379372	99.559
EPI_ISL_1379347	99.666
EPI_ISL_5365615	99.666
EPI_ISL_5365783	99.455
EPI_ISL_6567311	99.224
N/A	0
EPI_ISL_4212999	99.294
EPI_ISL_1971204	99.555
N/A	90.235
EPI_ISL_1379374	99.559
EPI_ISL_1379373	99.559
EPI_ISL_1971175	99.562
N/A	58.212
N/A	6.862
N/A	91.646
EPI_ISL_6567316	98.318
EPI_ISL_6567304	99.555
N/A	1.448
N/A	75.675
N/A	76.173
EPI_ISL_1379376	99.559
EPI_ISL_1379348	99.666
N/A	47.243
N/A	0.833
EPI_ISL_1379375	99.559
EPI_ISL_4212991	99.549
EPI_ISL_3246651	99.562
EPI_ISL_1968623	99.294
EPI_ISL_1971217	99.438
EPI_ISL_1971193	99.559
EPI_ISL_1971099	99.666
EPI_ISL_1971229	97.254
EPI_ISL_3246682	98.957
EPI_ISL_4212986	99.559
EPI_ISL_4212950	99.666
EPI_ISL_1971171	99.565
EPI_ISL_1971187	99.559
EPI_ISL_1971098	99.666
EPI_ISL_1971100	99.666
EPI_ISL_1971226	98.569
EPI_ISL_1971160	99.666
EPI_ISL_1971197	99.559
EPI_ISL_2402933	95.82
N/A	94.268
EPI_ISL_1971179	99.562
EPI_ISL_1971163	99.666
EPI_ISL_1971224	98.746
EPI_ISL_3246672	99.559
EPI_ISL_1971161	99.666
EPI_ISL_1971096	99.666
EPI_ISL_6567318	97.067
EPI_ISL_4212954	99.666
EPI_ISL_4212992	99.442
N/A	76.584
EPI_ISL_4212996	99.298
N/A	29.706
EPI_ISL_1971174	99.562
EPI_ISL_1971200	99.555
N/A	77.955
N/A	79.112
EPI_ISL_1971131	99.555
EPI_ISL_2402916	99.288
N/A	52.192
EPI_ISL_1971091	99.666
EPI_ISL_4212977	99.559
N/A	0
EPI_ISL_6567303	99.555
N/A	0
EPI_ISL_6678509	99.555
N/A	0.629
N/A	0
EPI_ISL_1971134	99.555
EPI_ISL_1971154	99.442
EPI_ISL_1971148	99.559
EPI_ISL_1971126	99.666
EPI_ISL_1971105	99.666
N/A	77.501
EPI_ISL_1971140	99.666
EPI_ISL_1971143	99.666
EPI_ISL_1971144	99.666
EPI_ISL_1971138	99.472
EPI_ISL_1971149	99.559
EPI_ISL_2031765	99.666
EPI_ISL_1971152	99.555
EPI_ISL_1971146	99.666
EPI_ISL_1971141	99.666
N/A	92.663
N/A	91.977
EPI_ISL_1971119	99.666
EPI_ISL_1971103	99.562
EPI_ISL_1971118	99.666
N/A	93.382
N/A	87.533
EPI_ISL_1971094	99.666
N/A	2.709
EPI_ISL_8083538	98.452
N/A	15.784
EPI_ISL_1971164	99.666
EPI_ISL_7040746	99.666
EPI_ISL_1971107	99.666
EPI_ISL_1971108	99.666
N/A	0
EPI_ISL_8083546	99.555
N/A	92.295
EPI_ISL_7808681	99.666
N/A	3.782
N/A	89.657
N/A	2.117
N/A	62.944
EPI_ISL_7130610	99.217
N/A	78.233
N/A	77.534
N/A	82.744
EPI_ISL_8083551	99.177
EPI_ISL_8083537	98.662
EPI_ISL_1971125	99.666
EPI_ISL_1971117	99.666
EPI_ISL_1971102	99.666
EPI_ISL_1971135	99.555
EPI_ISL_1971147	99.662
N/A	6.534
EPI_ISL_1971128	99.666
EPI_ISL_1971114	99.555
EPI_ISL_1971129	99.562
EPI_ISL_1971106	99.666
EPI_ISL_1971104	99.555
EPI_ISL_1971127	99.666
EPI_ISL_1971101	99.666
EPI_ISL_1971097	99.438
N/A	80.731
EPI_ISL_1971120	99.666
EPI_ISL_1971095	99.666
EPI_ISL_1971133	99.555
EPI_ISL_1971153	99.465
EPI_ISL_1971145	99.666
EPI_ISL_1971122	99.666
EPI_ISL_1971088	95.191
EPI_ISL_1971110	99.666
N/A	88.108
EPI_ISL_1971111	99.666
EPI_ISL_1971092	99.666
EPI_ISL_2031766	99.666
EPI_ISL_1971123	99.666
EPI_ISL_1971132	99.555
EPI_ISL_1971136	99.555
EPI_ISL_1971116	98.896
EPI_ISL_1971139	99.666
N/A	46.668
EPI_ISL_1971109	99.666
EPI_ISL_1971090	99.666
EPI_ISL_1971130	99.559
EPI_ISL_1971137	99.291
N/A	57.653
EPI_ISL_1971124	99.666
EPI_ISL_2031767	99.559
EPI_ISL_1971151	99.555
EPI_ISL_1971112	99.562
N/A	91.175
N/A	2.187
EPI_ISL_1971093	99.555
EPI_ISL_1971121	99.666
N/A	45.524
N/A	94.783
EPI_ISL_2031764	99.666
N/A	15.239
EPI_ISL_1971089	96.141
EPI_ISL_1971115	99.555
N/A	37.796
N/A	82.711
N/A	89.707
EPI_ISL_1971167	99.666
N/A	92.88
EPI_ISL_1971199	99.555
EPI_ISL_1971195	99.559
EPI_ISL_2086301	99.559
EPI_ISL_1971166	99.666
N/A	94.76
EPI_ISL_1971165	99.666
EPI_ISL_1971168	99.662
N/A	0
EPI_ISL_1971159	99.666
EPI_ISL_2086302	99.478
EPI_ISL_1971113	99.559
EPI_ISL_1971142	99.666
EPI_ISL_1971150	99.555
N/A	67.829
EPI_ISL_1971230	97.224
EPI_ISL_1971177	99.562
EPI_ISL_2086300	99.666
EPI_ISL_1971205	99.555
EPI_ISL_1971212	99.555
EPI_ISL_1971183	99.559
EPI_ISL_7040731	99.666
EPI_ISL_8083543	99.559
EPI_ISL_1971215	99.555
N/A	6.009
EPI_ISL_1971184	99.559
N/A	22.339
EPI_ISL_8083571	98.375
EPI_ISL_8083541	99.666
EPI_ISL_8083552	99.177
EPI_ISL_8083547	99.555
EPI_ISL_1971182	99.559
EPI_ISL_1971191	99.559
EPI_ISL_1971225	98.723
EPI_ISL_1971173	99.562
EPI_ISL_1971209	99.555
EPI_ISL_1971216	99.448
EPI_ISL_1971231	95.054
EPI_ISL_1971192	99.559
N/A	58.7
EPI_ISL_8083540	99.666
EPI_ISL_8083572	99.559
EPI_ISL_8083550	99.294
EPI_ISL_3246669	99.559
EPI_ISL_8083544	99.559
N/A	0
EPI_ISL_8083557	99.666
EPI_ISL_1971222	98.9
EPI_ISL_8083567	99.559
EPI_ISL_8083576	97.141
N/A	94.392
N/A	66.248
EPI_ISL_8083549	99.391
EPI_ISL_5858126	99.559
EPI_ISL_1971170	99.659
EPI_ISL_7041071	99.559
EPI_ISL_1971194	99.559
EPI_ISL_1971220	99.114
EPI_ISL_1971188	99.559
EPI_ISL_1971218	99.378
EPI_ISL_8083553	98.927
EPI_ISL_3246637	99.666
EPI_ISL_7130614	95.295
EPI_ISL_8083566	99.559
N/A	63.79
EPI_ISL_8083556	99.662
N/A	0
EPI_ISL_1971189	99.559
EPI_ISL_8083563	99.666
EPI_ISL_1971201	99.555
EPI_ISL_8083558	99.559
EPI_ISL_1971176	99.562
EPI_ISL_2086303	97.194
EPI_ISL_1971206	99.555
N/A	71.471
EPI_ISL_8083565	99.559
EPI_ISL_8083575	98.331
EPI_ISL_8083548	99.462
EPI_ISL_8083539	99.666
N/A	0
EPI_ISL_1967664	99.662
EPI_ISL_1971180	99.562
EPI_ISL_1971172	99.565
EPI_ISL_3246678	99.555
EPI_ISL_5858111	99.562
N/A	57.479
N/A	41.126
EPI_ISL_5858128	99.559
N/A	73.565
EPI_ISL_5858163	99.552
EPI_ISL_5858110	99.666
EPI_ISL_5858129	99.559
N/A	0
EPI_ISL_1967677	99.555
EPI_ISL_7130608	99.555
N/A	93.027
EPI_ISL_2404799	99.559
EPI_ISL_2402931	96.763
EPI_ISL_1967679	99.559
N/A	69.468
EPI_ISL_1971157	99.666
N/A	0
EPI_ISL_1967666	99.559
N/A	3.371
EPI_ISL_1967678	99.559
N/A	41.22
N/A	91.282
EPI_ISL_1967673	99.559
N/A	16.473
N/A	16.517
EPI_ISL_2404796	99.559
EPI_ISL_1967674	99.559
EPI_ISL_1967684	98.268
EPI_ISL_1967682	99.191
EPI_ISL_1967675	99.559
EPI_ISL_1967669	99.559
N/A	0.836
EPI_ISL_7808708	99.157
EPI_ISL_1967665	99.559
N/A	85.654
N/A	0
N/A	26.72
N/A	29.793
EPI_ISL_1967670	99.559
EPI_ISL_1967683	98.672
EPI_ISL_1967672	99.559
EPI_ISL_1967680	99.288
EPI_ISL_1967662	99.666
EPI_ISL_2404797	99.559
EPI_ISL_1967663	99.666
N/A	14.744
EPI_ISL_2404795	99.559
EPI_ISL_1967671	99.559
EPI_ISL_1967676	99.559
N/A	32.462
N/A	64.228
N/A	8.253
EPI_ISL_8083560	98.659
EPI_ISL_3246640	99.666
EPI_ISL_8083564	99.559
N/A	0
EPI_ISL_1967668	99.559
EPI_ISL_8083542	99.559
N/A	71.013
EPI_ISL_1967681	99.141
N/A	30.328
N/A	86.048
EPI_ISL_3246635	99.666
EPI_ISL_6567278	99.559
EPI_ISL_7040765	99.666
EPI_ISL_3246670	99.559
N/A	0
EPI_ISL_6567280	99.559
EPI_ISL_1971372	99.666
EPI_ISL_1971382	99.559
N/A	55.326
EPI_ISL_1971392	99.559
EPI_ISL_1967667	99.559
EPI_ISL_1971404	98.004
N/A	42.698
N/A	1.134
EPI_ISL_2404798	99.559
N/A	0
N/A	0
EPI_ISL_6567314	98.632
EPI_ISL_6567305	99.555
EPI_ISL_1971398	99.555
EPI_ISL_3246665	99.559
N/A	0.98
EPI_ISL_1971390	99.559
EPI_ISL_1971383	99.559
EPI_ISL_1971371	99.666
EPI_ISL_1971384	99.559
N/A	93.068
EPI_ISL_2086266	96.255
N/A	0
EPI_ISL_1971393	99.555
EPI_ISL_1971373	99.666
EPI_ISL_1971406	95.709
N/A	94.904
N/A	35.93
EPI_ISL_1971385	99.559
N/A	0
EPI_ISL_3246666	99.559
EPI_ISL_3246642	99.666
N/A	1.478
EPI_ISL_6567309	99.338
EPI_ISL_6567282	99.559
EPI_ISL_3246634	99.666
N/A	2.307
N/A	30.144
EPI_ISL_3246641	99.666
EPI_ISL_6567285	99.559
EPI_ISL_1971370	99.666
EPI_ISL_1971386	99.559
EPI_ISL_1971379	99.559
N/A	17.57
N/A	32.916
EPI_ISL_1971380	99.559
EPI_ISL_1971405	96.619
EPI_ISL_1971376	99.562
EPI_ISL_1971389	99.559
EPI_ISL_1971399	99.555
EPI_ISL_1971402	99.064
EPI_ISL_3246671	99.559
N/A	77.838
EPI_ISL_1971375	99.562
N/A	0.719
EPI_ISL_3246643	99.666
EPI_ISL_1971403	98.231
N/A	22.098
EPI_ISL_1971381	99.559
EPI_ISL_1971391	99.559
N/A	33.883
EPI_ISL_1971395	99.555
N/A	21.78
EPI_ISL_2081131	99.555
EPI_ISL_2081130	99.495
EPI_ISL_1971400	99.555
EPI_ISL_1971369	99.666
EPI_ISL_3246680	99.211
N/A	43.905
EPI_ISL_1971397	99.555
EPI_ISL_2081128	99.555
EPI_ISL_2081141	99.559
N/A	0.696
EPI_ISL_1971388	99.559
EPI_ISL_8083569	99.555
EPI_ISL_1971374	99.666
EPI_ISL_1971394	99.555
EPI_ISL_2081134	99.666
EPI_ISL_1971378	99.559
EPI_ISL_1971387	99.559
EPI_ISL_1971396	99.555
N/A	91.62
N/A	57.82
N/A	78.989
EPI_ISL_2081144	99.559
EPI_ISL_1971401	99.191
EPI_ISL_2081140	99.472
N/A	5.705
EPI_ISL_2081133	99.559
EPI_ISL_2081142	99.559
N/A	0
EPI_ISL_2081132	99.666
N/A	16.868
EPI_ISL_2081137	99.559
EPI_ISL_2081138	99.666
EPI_ISL_2081136	99.559
EPI_ISL_2081143	99.666
N/A	52.563
EPI_ISL_2081147	99.666
EPI_ISL_2081148	99.559
EPI_ISL_2081139	99.559
EPI_ISL_2081149	99.666
EPI_ISL_1971377	99.559
EPI_ISL_8083545	99.559
EPI_ISL_2081135	99.666
EPI_ISL_2081146	99.559
N/A	39.936
EPI_ISL_2082729	99.559
N/A	8.36
N/A	19.45
EPI_ISL_6567315	98.338
EPI_ISL_2081157	99.559
EPI_ISL_6567283	99.559
N/A	73.842
EPI_ISL_2081145	99.559
EPI_ISL_2081154	99.666
N/A	93.82
EPI_ISL_2081155	99.666
N/A	0.839
EPI_ISL_2081151	99.666
N/A	3.528
N/A	0
EPI_ISL_6567307	99.549
EPI_ISL_2081156	98.9
N/A	0
N/A	7.611
EPI_ISL_2081150	99.298
EPI_ISL_2081152	99.445
N/A	4.481
EPI_ISL_2081129	99.666
N/A	6.675
EPI_ISL_2081159	99.666
N/A	92.389
EPI_ISL_6567306	99.555
EPI_ISL_3246667	99.559
EPI_ISL_4212978	99.559
EPI_ISL_3246636	99.666
EPI_ISL_2081160	99.555
N/A	13.433
EPI_ISL_3246677	99.555
EPI_ISL_2081161	99.666
N/A	0.612
N/A	37.715
EPI_ISL_5365746	99.559
N/A	65.468
EPI_ISL_2081167	97.686
EPI_ISL_2081163	99.666
EPI_ISL_2081165	99.666
EPI_ISL_2081166	95.913
EPI_ISL_2081162	99.559
N/A	0.595
N/A	0
N/A	74.561
EPI_ISL_2282239	99.559
EPI_ISL_2282238	99.559
EPI_ISL_2081164	99.154
EPI_ISL_2081158	99.559
EPI_ISL_2081153	99.666
N/A	1.134
EPI_ISL_2282244	99.438
N/A	68.067
N/A	92.011
EPI_ISL_2081168	99.452
N/A	13.831
EPI_ISL_2282236	99.662
N/A	0
N/A	0.438
N/A	0
EPI_ISL_6567310	99.268
EPI_ISL_5365743	99.559
EPI_ISL_2402855	99.559
EPI_ISL_2282237	99.559
N/A	90.085
N/A	3.327
N/A	0
EPI_ISL_2282240	99.559
N/A	49.022
N/A	0
EPI_ISL_2282235	99.666
EPI_ISL_2283262	98.943
EPI_ISL_2282241	99.559
N/A	0
EPI_ISL_2282245	98.555
N/A	0.716
EPI_ISL_2282243	99.559
N/A	0
N/A	80.938
EPI_ISL_2282246	95.877
N/A	59.482
N/A	2.859
N/A	28.098
EPI_ISL_2282242	99.559
N/A	0
N/A	0
N/A	7.494
EPI_ISL_2283240	99.555
N/A	16.851
EPI_ISL_2273967	99.555
EPI_ISL_2450660	99.559
EPI_ISL_2450661	99.559
EPI_ISL_2450682	99.057
N/A	1.348
EPI_ISL_2455391	99.666
EPI_ISL_2450638	99.666
EPI_ISL_7040696	99.666
EPI_ISL_7130612	98.88
EPI_ISL_7130617	95.104
EPI_ISL_2455392	99.666
EPI_ISL_2273926	99.559
EPI_ISL_2273974	99.184
EPI_ISL_2273981	98.937
EPI_ISL_2450657	99.559
EPI_ISL_2402866	99.559
EPI_ISL_2273899	99.559
N/A	67.411
N/A	5.866
EPI_ISL_2273934	99.559
EPI_ISL_2273979	99.047
EPI_ISL_2402902	99.555
EPI_ISL_2273950	99.555
EPI_ISL_2450688	97.632
N/A	0
N/A	0
N/A	0
N/A	0
EPI_ISL_2273949	99.555
EPI_ISL_5858127	99.559
N/A	1.418
N/A	26.823
EPI_ISL_2402862	99.559
EPI_ISL_2402874	99.559
N/A	7.976
EPI_ISL_2402859	99.559
EPI_ISL_2402845	99.559
N/A	40.815
EPI_ISL_2402856	99.559
N/A	0
N/A	77.812
EPI_ISL_2402819	99.559
EPI_ISL_2402908	99.555
N/A	3.224
EPI_ISL_2402818	99.559
EPI_ISL_2402825	99.559
EPI_ISL_2402894	99.555
N/A	0
EPI_ISL_2450674	99.482
EPI_ISL_2758231	99.555
EPI_ISL_2450681	99.107
N/A	1.749
EPI_ISL_2450685	98.736
EPI_ISL_2450678	99.288
N/A	0
N/A	91.265
EPI_ISL_2758233	99.438
EPI_ISL_2774496	99.555
EPI_ISL_2758226	99.562
EPI_ISL_2758230	99.559
EPI_ISL_6567284	99.559
EPI_ISL_2758228	99.559
EPI_ISL_2758234	98.856
EPI_ISL_2758225	99.666
N/A	13.892
EPI_ISL_2758235	97.626
EPI_ISL_2758227	99.559
EPI_ISL_2758232	99.555
EPI_ISL_2774495	99.555
N/A	2.485
EPI_ISL_2774524	99.559
EPI_ISL_2758229	99.559
N/A	0
EPI_ISL_2774525	99.555
EPI_ISL_2774526	98.699
N/A	7.427
EPI_ISL_3235366	99.017
N/A	91.747
EPI_ISL_3235365	99.375
EPI_ISL_7808701	99.559
N/A	0
EPI_ISL_3235367	98.579
N/A	0.09
N/A	36.572
EPI_ISL_3246922	99.562
EPI_ISL_3235364	99.559
EPI_ISL_3235363	99.666
EPI_ISL_3246627	99.666
N/A	0
EPI_ISL_3246654	99.559
EPI_ISL_3246655	99.559
EPI_ISL_3246628	99.666
EPI_ISL_3246629	99.666
N/A	0
EPI_ISL_3246658	99.559
N/A	0
EPI_ISL_3246656	99.559
EPI_ISL_3246675	99.559
EPI_ISL_3246649	99.666
EPI_ISL_3246657	99.559
EPI_ISL_3246647	99.666
EPI_ISL_3246630	99.666
N/A	9.895
N/A	0
EPI_ISL_3246648	99.666
N/A	20.165
N/A	26.767
N/A	2.244
EPI_ISL_3642618	99.559
N/A	21.881
N/A	33.846
EPI_ISL_3642647	99.555
N/A	81.868
EPI_ISL_3642681	96.709
EPI_ISL_3642619	99.559
EPI_ISL_3642620	99.559
N/A	80.768
N/A	93.215
EPI_ISL_3642649	99.555
EPI_ISL_3642651	99.555
EPI_ISL_3642621	99.559
N/A	0
EPI_ISL_3642648	99.555
EPI_ISL_3642624	99.559
N/A	0.318
N/A	0
N/A	30.014
EPI_ISL_3642623	99.559
EPI_ISL_3642622	99.559
N/A	59.238
EPI_ISL_3642675	99.281
N/A	19.988
EPI_ISL_7808682	99.666
EPI_ISL_3642625	99.559
EPI_ISL_3642626	99.559
EPI_ISL_3642653	99.555
EPI_ISL_4263007	99.666
EPI_ISL_4263006	99.666
EPI_ISL_3642650	99.555
EPI_ISL_3642631	99.559
N/A	0
EPI_ISL_3642655	99.555
EPI_ISL_3642657	99.555
EPI_ISL_3642677	98.957
EPI_ISL_4051034	99.301
N/A	84.349
EPI_ISL_3642654	99.555
EPI_ISL_3642635	99.559
EPI_ISL_3642629	99.559
EPI_ISL_3642627	99.559
EPI_ISL_3642628	99.559
EPI_ISL_3642630	99.559
EPI_ISL_3642656	99.555
EPI_ISL_3642652	99.555
N/A	64
N/A	0
EPI_ISL_3642633	99.559
N/A	0
N/A	1.247
EPI_ISL_3642634	99.559
EPI_ISL_3642660	99.555
N/A	0
EPI_ISL_3642674	99.442
EPI_ISL_3642662	99.555
EPI_ISL_3642661	99.555
EPI_ISL_3642658	99.555
N/A	0
EPI_ISL_3642639	99.559
EPI_ISL_3642663	99.555
N/A	0
EPI_ISL_3642632	99.559
EPI_ISL_3642638	99.559
EPI_ISL_3642666	99.555
N/A	92.175
EPI_ISL_3642659	99.555
EPI_ISL_3642680	97.01
EPI_ISL_3642637	99.559
N/A	1.057
N/A	0
N/A	75.464
EPI_ISL_3642664	99.555
N/A	0
EPI_ISL_3642643	99.559
EPI_ISL_3642667	99.555
EPI_ISL_3642678	98.856
N/A	0
EPI_ISL_3642676	99.027
N/A	0
EPI_ISL_3642636	99.559
EPI_ISL_3642672	99.555
N/A	72.24
EPI_ISL_3642671	99.555
N/A	0
EPI_ISL_3642679	98.134
N/A	0
N/A	88.429
EPI_ISL_3642669	99.555
N/A	67.05
N/A	0
EPI_ISL_3642640	99.559
EPI_ISL_3642641	99.559
N/A	93.924
EPI_ISL_3642642	99.559
N/A	0
EPI_ISL_3642646	99.559
EPI_ISL_3642668	99.555
EPI_ISL_3642670	99.555
EPI_ISL_3642645	99.559
N/A	54.623
EPI_ISL_3642665	99.555
EPI_ISL_4051041	99.559
EPI_ISL_3642673	99.468
EPI_ISL_3642644	99.559
N/A	3.739
EPI_ISL_7808683	99.666
EPI_ISL_4051021	99.559
N/A	0.719
EPI_ISL_4050999	99.666
EPI_ISL_4051040	99.442
EPI_ISL_4051042	99.666
EPI_ISL_4051027	99.559
EPI_ISL_4051005	99.666
EPI_ISL_4051003	99.666
N/A	88.623
EPI_ISL_4051024	99.559
EPI_ISL_4051002	99.666
N/A	88.647
EPI_ISL_4051020	99.559
EPI_ISL_4051026	99.559
EPI_ISL_4051023	99.559
EPI_ISL_4051022	99.559
EPI_ISL_4051000	99.666
EPI_ISL_4051035	99.301
EPI_ISL_19210573	95.479
N/A	87.008
EPI_ISL_4051004	99.666
EPI_ISL_4051001	99.666
N/A	94.402
EPI_ISL_4050998	99.666
EPI_ISL_4051010	99.666
EPI_ISL_4051025	99.559
EPI_ISL_4051007	99.666
EPI_ISL_4051039	98.646
EPI_ISL_4051006	99.666
N/A	54.887
EPI_ISL_4051011	99.666
N/A	66.351
N/A	67.97
N/A	58.074
N/A	50.788
EPI_ISL_4051038	98.773
EPI_ISL_4051013	99.666
EPI_ISL_4051037	99.114
EPI_ISL_4051036	99.298
EPI_ISL_4051032	99.559
EPI_ISL_4051009	99.666
EPI_ISL_4051017	99.666
EPI_ISL_4051029	99.559
EPI_ISL_4051014	99.666
EPI_ISL_4051019	99.666
N/A	33.873
EPI_ISL_4051033	99.559
EPI_ISL_4051030	99.559
EPI_ISL_7808684	99.666
EPI_ISL_4051015	99.666
EPI_ISL_7808702	99.559
EPI_ISL_4051028	99.559
EPI_ISL_4051008	99.666
N/A	92.623
EPI_ISL_4051012	99.666
EPI_ISL_4051016	99.666
EPI_ISL_4051031	99.559
N/A	60.496
EPI_ISL_4051018	99.666
N/A	73.053
EPI_ISL_4212962	99.559
N/A	0
EPI_ISL_4882442	99.559
N/A	11.093
EPI_ISL_4212927	99.666
EPI_ISL_4212997	99.294
EPI_ISL_4212932	99.666
N/A	71.702
N/A	10.668
EPI_ISL_4212930	99.666
EPI_ISL_4212961	99.559
EPI_ISL_4212931	99.666
N/A	14.38
EPI_ISL_4212933	99.666
EPI_ISL_4212963	99.559
EPI_ISL_4212937	99.666
EPI_ISL_4212967	99.559
EPI_ISL_4212994	99.418
EPI_ISL_4212956	99.562
EPI_ISL_4213003	96.726
EPI_ISL_4212929	99.666
EPI_ISL_4212968	99.559
EPI_ISL_4212965	99.559
EPI_ISL_4213004	96.566
EPI_ISL_4212928	99.666
N/A	21.202
EPI_ISL_4212935	99.666
EPI_ISL_4212969	99.559
EPI_ISL_4212971	99.559
EPI_ISL_4212939	99.666
EPI_ISL_4212970	99.559
EPI_ISL_4212936	99.666
EPI_ISL_4212934	99.666
EPI_ISL_4212942	99.666
EPI_ISL_4212966	99.559
EPI_ISL_4213002	98.261
EPI_ISL_4212974	99.559
EPI_ISL_4212948	99.666
EPI_ISL_7808685	99.666
N/A	1.094
EPI_ISL_7808703	99.559
EPI_ISL_4212941	99.666
EPI_ISL_4212972	99.559
EPI_ISL_4212957	99.562
EPI_ISL_4213001	98.696
EPI_ISL_4212938	99.666
EPI_ISL_4212973	99.559
EPI_ISL_4212993	99.431
N/A	38.207
N/A	0
EPI_ISL_4212989	99.555
EPI_ISL_4212943	99.666
EPI_ISL_4882443	99.559
EPI_ISL_4212946	99.666
EPI_ISL_4212947	99.666
EPI_ISL_4212940	99.666
EPI_ISL_4212979	99.559
EPI_ISL_4212945	99.666
EPI_ISL_4212958	99.562
EPI_ISL_4212944	99.666
EPI_ISL_4212982	99.559
EPI_ISL_4212980	99.559
EPI_ISL_4212959	99.562
EPI_ISL_4212984	99.559
EPI_ISL_4212981	99.559
N/A	92.171
EPI_ISL_4212964	99.559
N/A	5.063
EPI_ISL_4212983	99.559
EPI_ISL_4212976	99.559
EPI_ISL_4212953	99.666
EPI_ISL_4212951	99.666
EPI_ISL_4212949	99.666
N/A	78.547
N/A	40.274
EPI_ISL_4212975	99.559
EPI_ISL_4213000	99.003
EPI_ISL_4882401	99.666
EPI_ISL_4882454	97.96
EPI_ISL_4882403	99.666
N/A	3.026
N/A	93.563
EPI_ISL_4212952	99.666
EPI_ISL_4212985	99.559
N/A	0.719
N/A	0.114
EPI_ISL_4212990	99.555
EPI_ISL_4882418	99.559
EPI_ISL_4882422	99.559
EPI_ISL_4882417	99.559
EPI_ISL_4882407	99.666
N/A	72.535
N/A	93.325
EPI_ISL_4882423	99.559
EPI_ISL_4882414	99.562
EPI_ISL_4882429	99.559
EPI_ISL_4882431	99.559
EPI_ISL_4882402	99.666
EPI_ISL_4882449	98.853
EPI_ISL_4882445	99.555
N/A	52.65
EPI_ISL_4882432	99.559
N/A	88.647
EPI_ISL_4882453	98.361
EPI_ISL_4882416	99.559
EPI_ISL_4882421	99.559
N/A	0
EPI_ISL_4882408	99.666
EPI_ISL_4882430	99.559
N/A	48.176
EPI_ISL_4882413	99.662
EPI_ISL_4882419	99.559
EPI_ISL_5365476	99.666
EPI_ISL_5365621	99.559
N/A	2.936
EPI_ISL_4882404	99.666
EPI_ISL_4882424	99.559
EPI_ISL_4882405	99.666
EPI_ISL_4882425	99.559
EPI_ISL_7808686	99.666
EPI_ISL_4882420	99.559
EPI_ISL_4882447	99.264
EPI_ISL_4882450	98.763
EPI_ISL_4882441	99.559
EPI_ISL_4882415	99.562
EPI_ISL_4882426	99.559
EPI_ISL_7808688	99.666
EPI_ISL_7808687	99.666
EPI_ISL_5365623	99.559
EPI_ISL_4882412	99.666
EPI_ISL_4882451	98.686
EPI_ISL_5365786	99.314
EPI_ISL_5365502	99.666
EPI_ISL_5365790	98.529
EPI_ISL_4882446	99.555
EPI_ISL_4882406	99.666
EPI_ISL_5365810	95.612
EPI_ISL_5365764	99.555
EPI_ISL_4882433	99.559
EPI_ISL_4882427	99.559
N/A	62.027
EPI_ISL_4882452	98.361
N/A	3.18
EPI_ISL_4882428	99.559
EPI_ISL_5365624	99.559
EPI_ISL_4882448	99.064
EPI_ISL_4882440	99.559
EPI_ISL_4882435	99.559
EPI_ISL_4882411	99.666
EPI_ISL_4882410	99.666
EPI_ISL_5365622	99.559
N/A	3.949
EPI_ISL_4882439	99.559
EPI_ISL_4882437	99.559
EPI_ISL_4882434	99.559
EPI_ISL_7808705	99.552
EPI_ISL_5365483	99.666
EPI_ISL_5365635	99.559
EPI_ISL_4882438	99.559
EPI_ISL_4882436	99.559
EPI_ISL_5365517	99.666
EPI_ISL_5365518	99.666
EPI_ISL_5365627	99.559
EPI_ISL_5365787	99.304
EPI_ISL_5365754	99.559
N/A	0
EPI_ISL_5365636	99.559
EPI_ISL_5365630	99.559
EPI_ISL_5365629	99.559
N/A	34.104
EPI_ISL_5365634	99.559
N/A	82.386
EPI_ISL_5365628	99.559
EPI_ISL_7808689	99.666
EPI_ISL_5365588	99.666
EPI_ISL_5365667	99.559
EPI_ISL_5365549	99.666
EPI_ISL_5365632	99.559
EPI_ISL_5365801	97.81
EPI_ISL_5365765	99.555
EPI_ISL_5365752	99.559
EPI_ISL_5365751	99.559
EPI_ISL_5365569	99.666
EPI_ISL_5365654	99.559
EPI_ISL_5365753	99.559
EPI_ISL_5365532	99.666
[truncated: 4,177 more rows]
